# Supplementary figures and images for: Evaluation of Stormwater Detention Pond to Prepare Recreational Water Quality
Source: Research Square preprint supplement (doi:10.21203/rs.3.rs-527305/v1), 2021-06-09

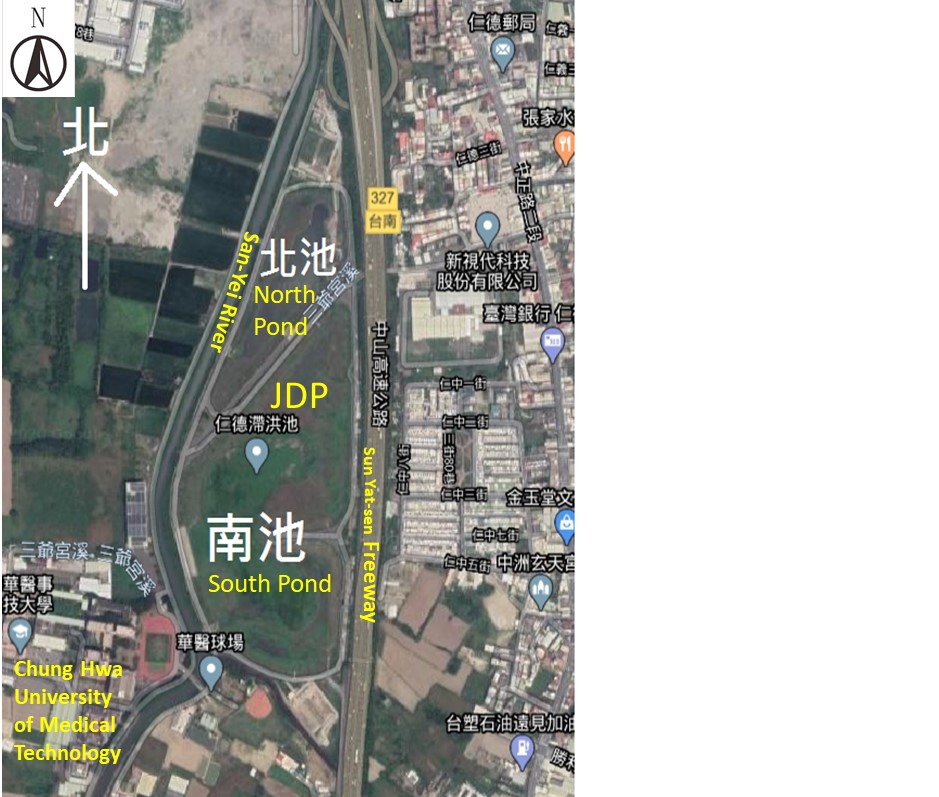


Supplementary Fig. 1. Location of JDP adapted from Google Earth.

Supplement: Supplementary file 1 [file 8f2c38b56bca6befad18c1be.docx]
